# Supplementary material for: Distribution Types of Lichens in Hungary That Indicate Changing Environmental Conditions
Source: MDPI journal article supplement (doi:10.3390/jof8060600), 2022-06-03
Supplement: s1 [file s1]

Supplement for Article

# Distribution types of lichens in Hungary that indicate changing environmental conditions

Edit Farkas <sup>1,\*</sup>, Nóra Varga <sup>1</sup>, Katalin Veres <sup>1</sup>, Gábor Matus <sup>2</sup>, Mónika Sinigla <sup>3</sup> and László Lőkös <sup>4</sup>

- <sup>1</sup> Institute of Ecology and Botany, Centre for Ecological Research, H-2163 Vácrátót, Hungary; farkas.edit@ecolres.hu; varga.nora@ecolres.hu; veres.katalin@ecolres.hu  
<sup>2</sup> Department of Botany, Faculty of Science and Technology, University of Debrecen, H-4010 Debrecen, Hungary; matus.gabor@science.unideb.hu  
<sup>3</sup> Bakony Museum of the Hungarian Natural History Museum, H-8420 Zirc, Hungary; monikasinigla@gmail.com  
<sup>4</sup> Department of Botany, Hungarian Natural History Museum, H-1431 Budapest, Hungary; lokos.laszlo@nhmus.hu  
\* Correspondence: farkas.edit@ecolres.hu

Supplementary Figures S1–S8  
Supplementary Table S1

**Citation:** Edit Farkas <sup>1,\*</sup>, Nóra Varga <sup>1</sup>, Katalin Veres <sup>1</sup>, Gábor Matus <sup>2</sup>, Mónika Sinigla <sup>3</sup> and László Lőkös <sup>4</sup>  
Distribution types of lichens in Hungary indicate changing environmental conditions. *J. Fungi* **2022**, *8*, 600.  
<https://doi.org/10.3390/jof8060600>

Academic Editor: Firstname  
Lastname

Received: date  
Accepted: date  
Published: date

**Publisher's Note:** MDPI stays neutral with regard to jurisdictional claims in published maps and institutional affiliations.

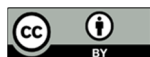

**Copyright:** © 2022 by the authors. Submitted for possible open access publication under the terms and conditions of the Creative Commons Attribution (CC BY) license (<https://creativecommons.org/licenses/by/4.0/>).

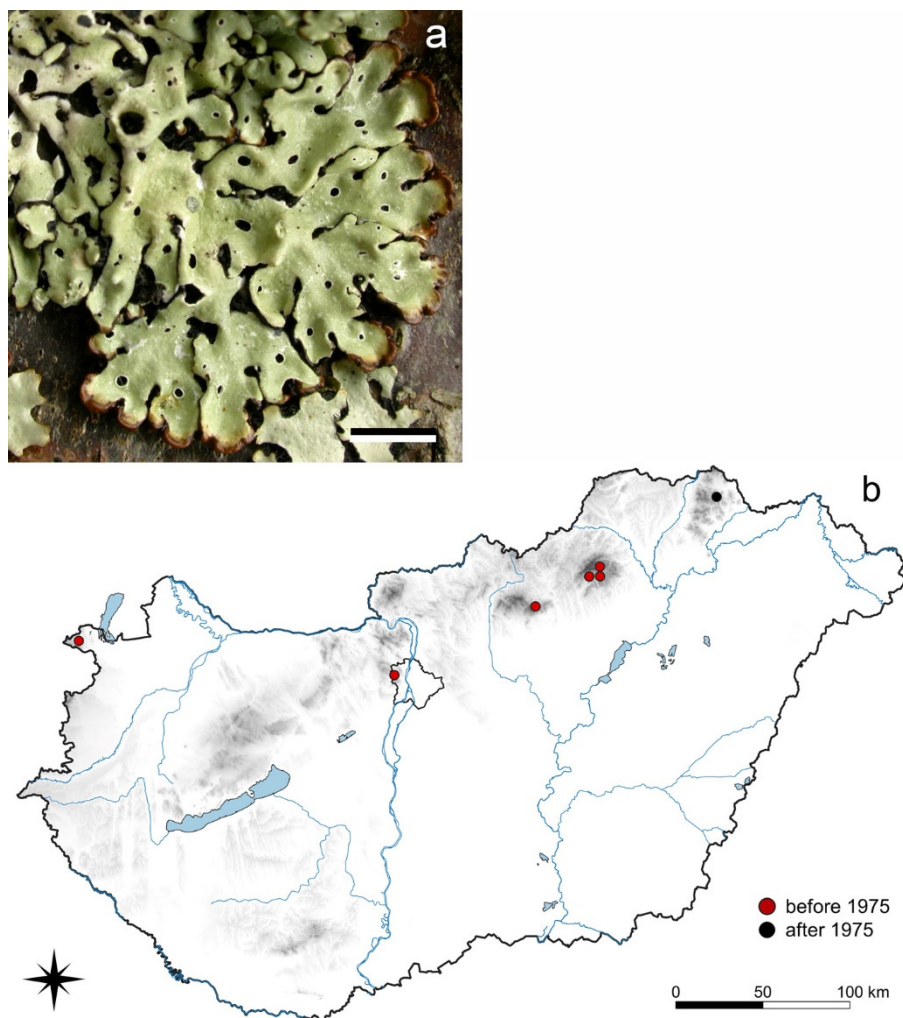

**Figure S1.** *Menegazzia terebrata* (a) habit (scale 1 cm); (b) its distribution in Hungary (10 records). Dots represent c. 5 × 6 km areas. (Photo: © E. Timdal)

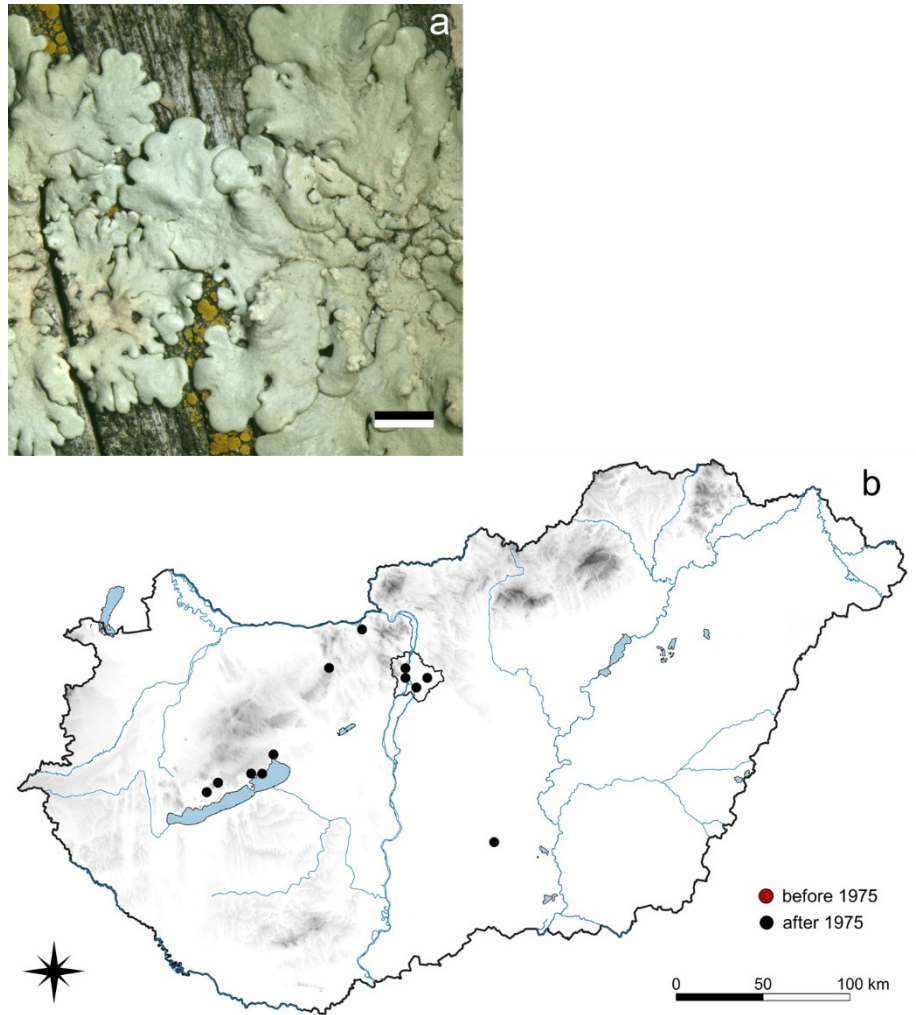

**Figure S2.** *Flavoparmelia soledians* (a) habit (scale 0.5 cm); (b) its distribution in Hungary (19 records). Dots represent c. 5 km × 6 km areas. (Photo: E. Farkas)

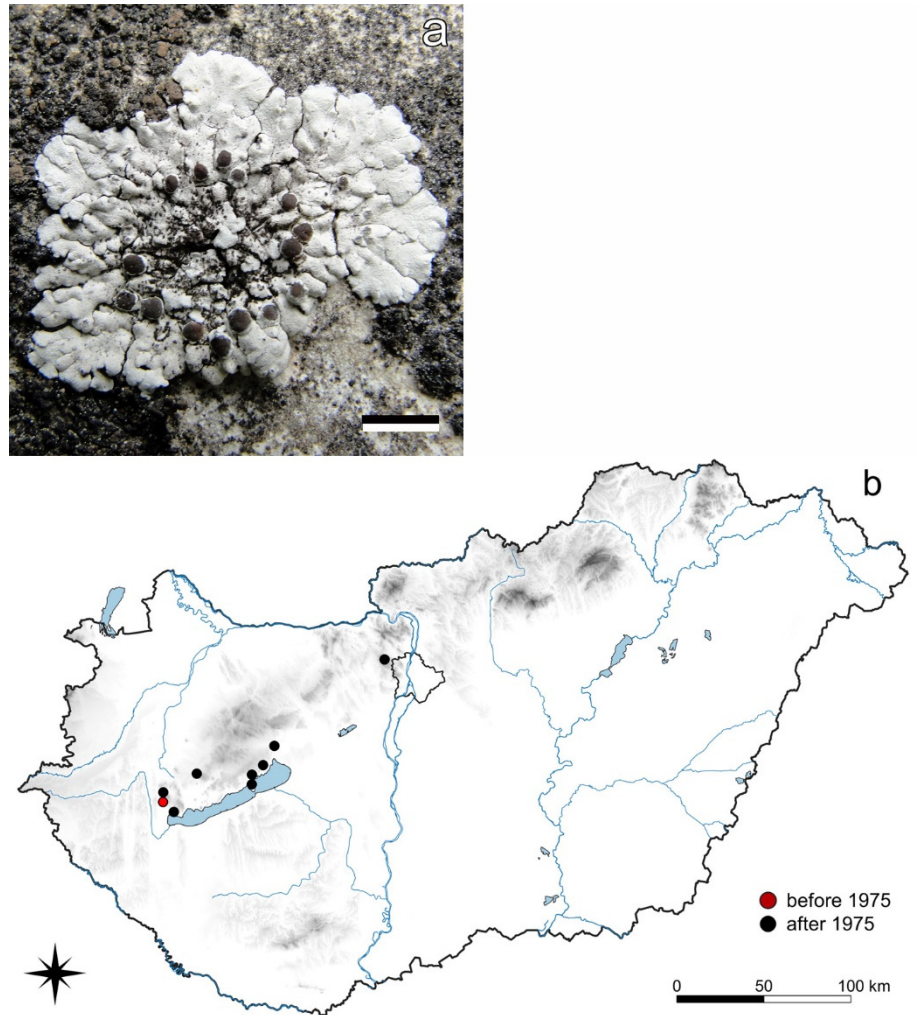

**Figure S3.** *Solenopsora candicans* (a) habit (scale 0.5 cm); (b) its distribution in Hungary (13 records). Dots represent c. 5 km × 6 km areas. (Photo: E. Farkas)

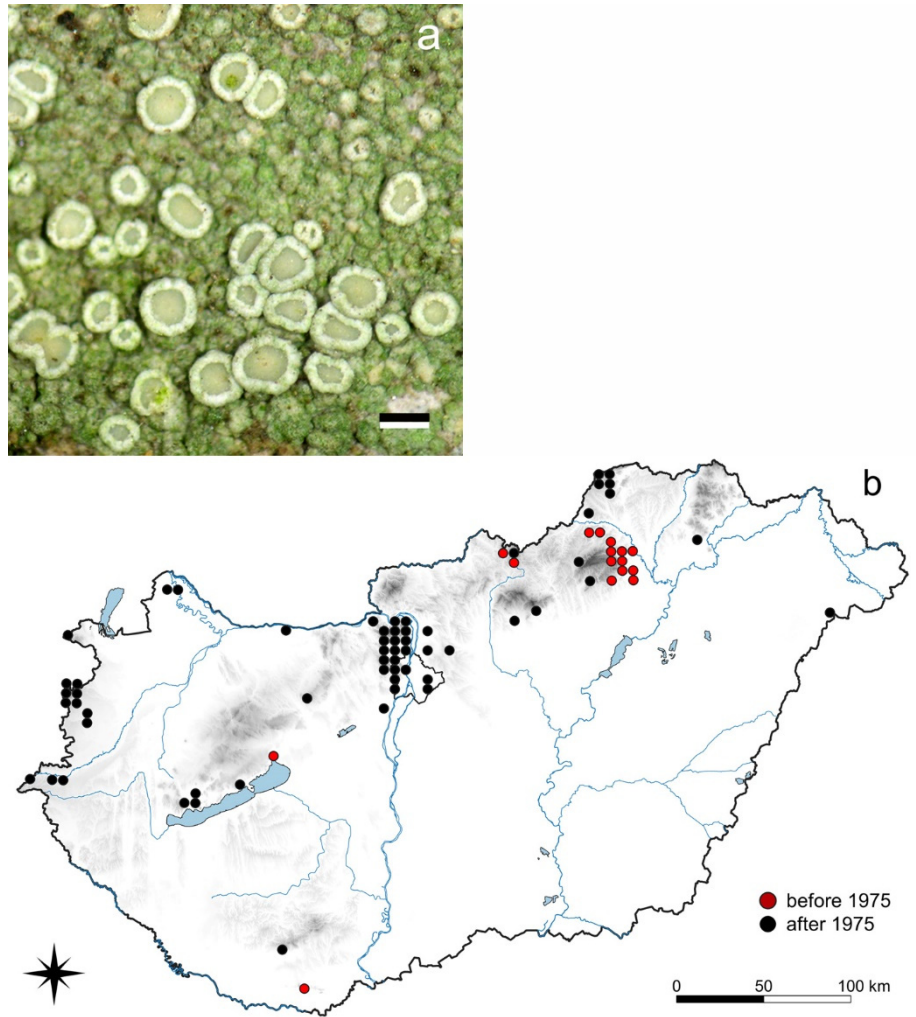

**Figure S4.** *Straminella conizaeoides* (a) habit (scale 0.1 cm); (b) its distribution in Hungary (241 records altogether). Dots represent c. 5 km × 6 km areas. (Photo: E. Farkas)

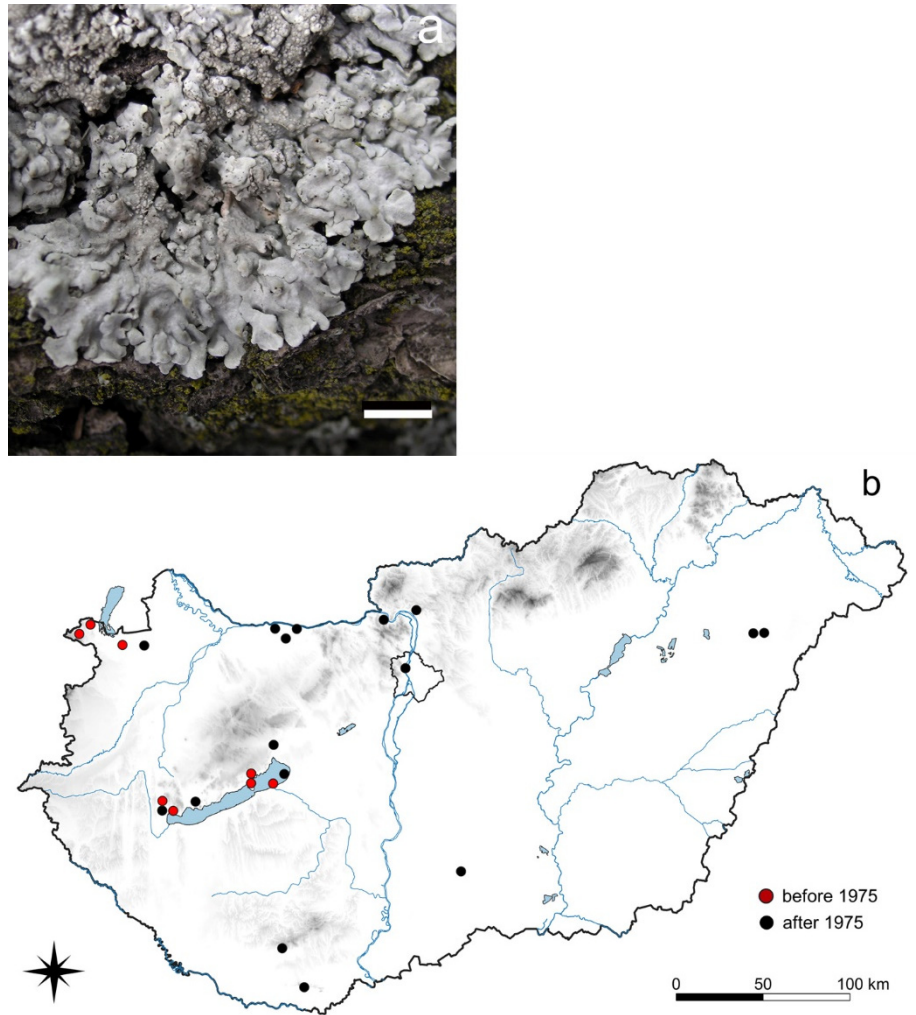

**Figure S5.** *Physcia aipolioides* (a) habit (scale 0.5 cm); (b) its distribution in Hungary (31 records). Dots represent c. 5 km × 6 km areas. (Photo: L. Lőkös)

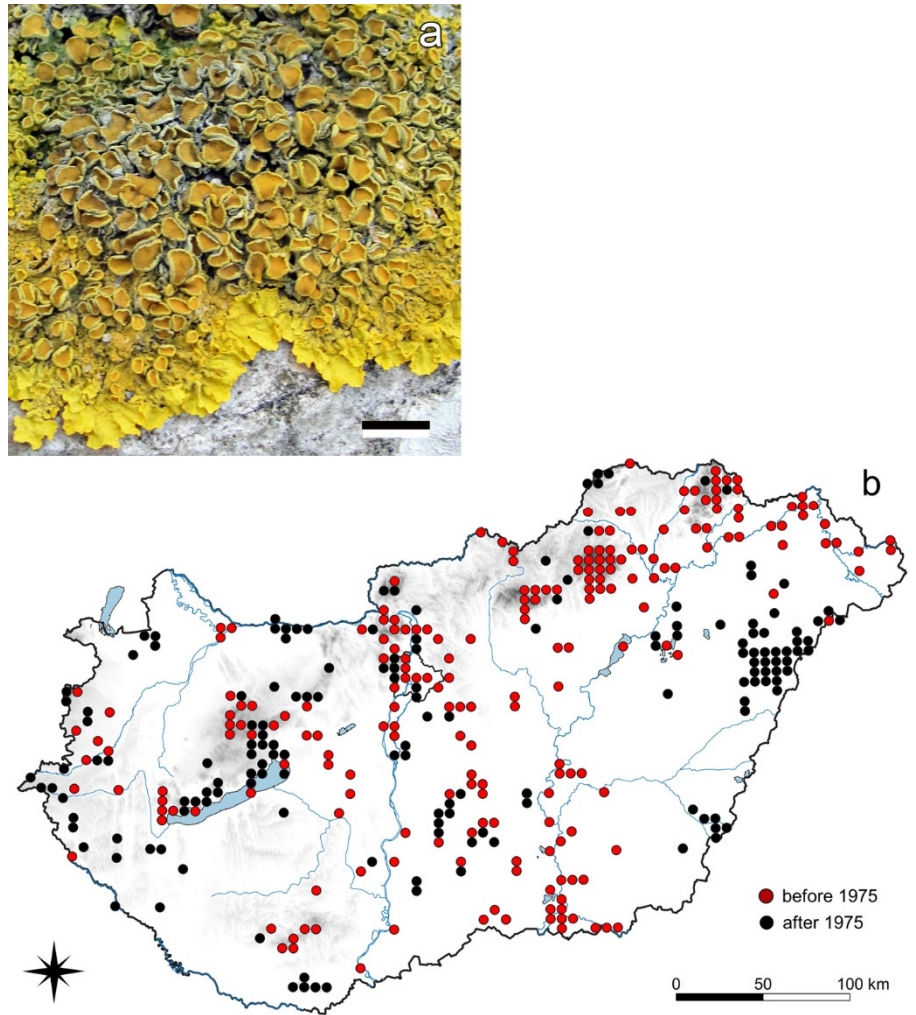

**Figure S6.** *Xanthoria parietina* (a) habit (scale 1 cm); (b) its distribution in Hungary (1023 records). Dots represent c. 5 km × 6 km areas. (Photo: E. Farkas)

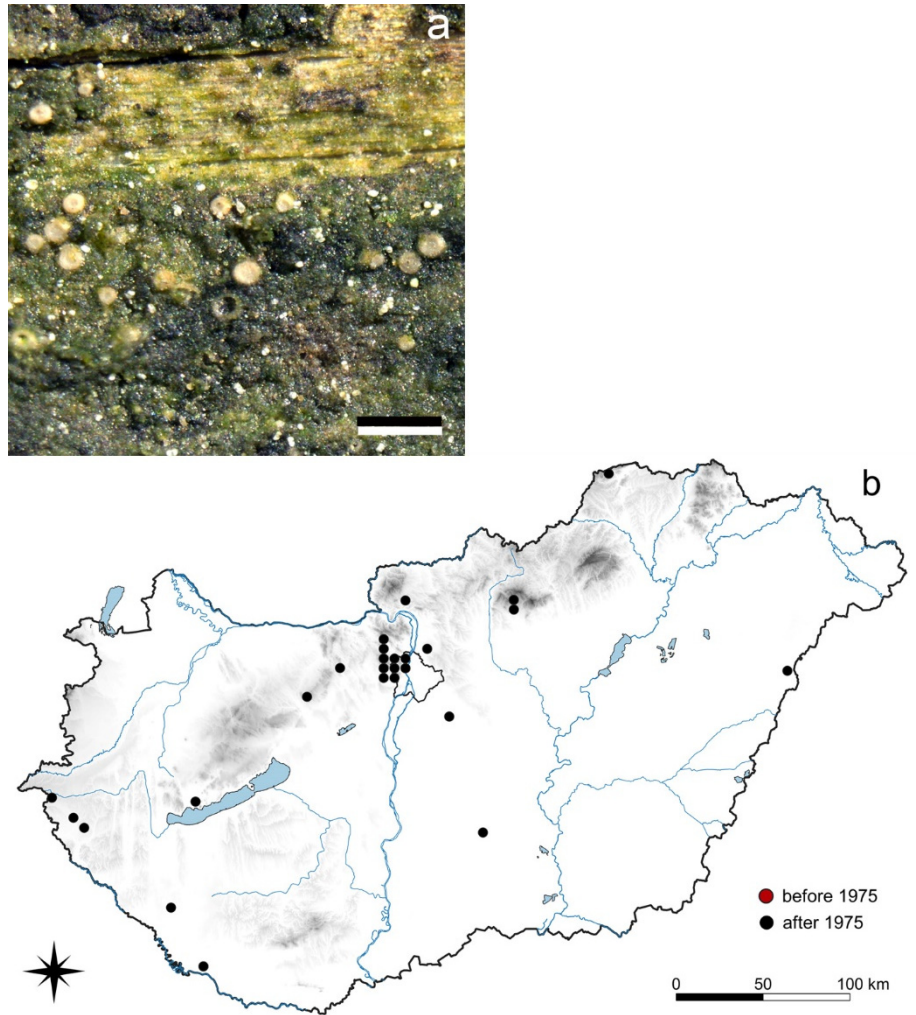

**Figure S7.** *Absconditella lignicola* (a) habit (scale 0.5 cm); (b) its distribution in Hungary (37 records, 2009–2022). Dots represent c. 5 km × 6 km areas. (Photo: E. Farkas)

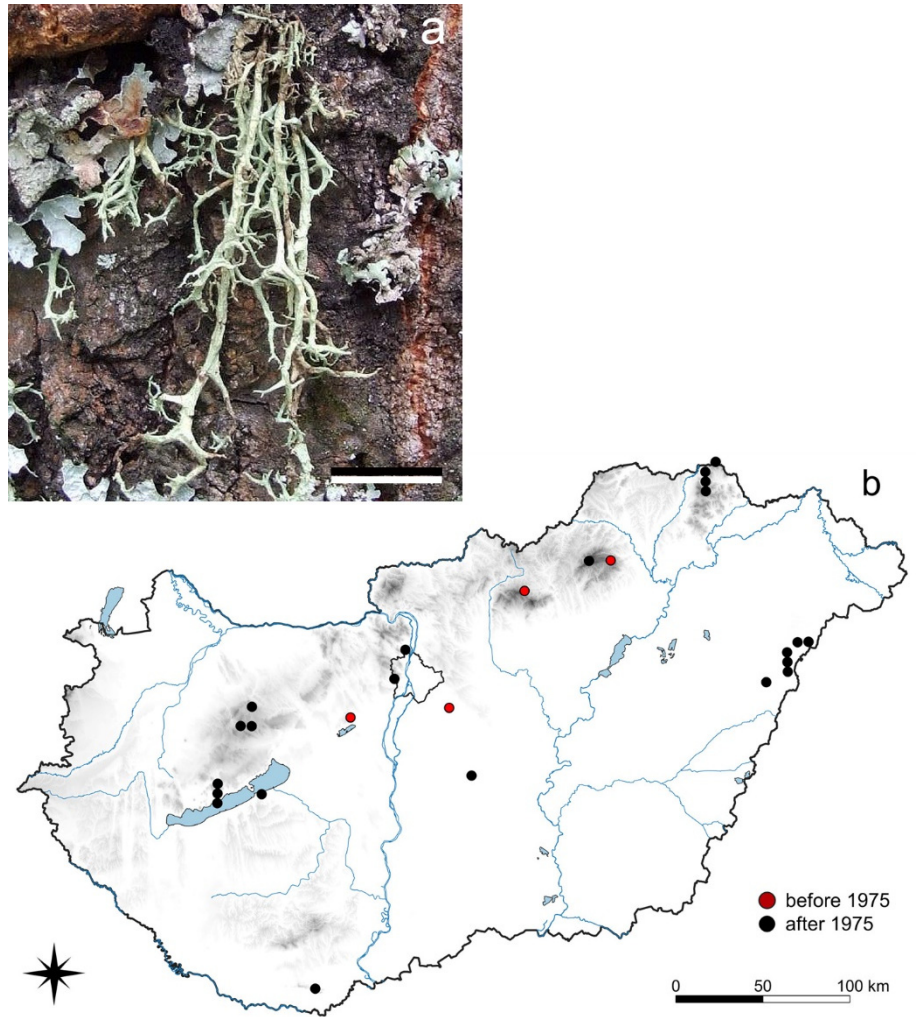

**Figure S8.** *Evernia divaricata* (a) habit (scale 1 cm); (b) its distribution in Hungary (35 records). Dots represent c. 5 km × 6 km areas. (Photo: G. Matus)

**Table S1.** Distribution records of illustrated species with main literature sources (containing published distribution records) and additional herbarium records (herbarium code, locality code [57,58], year)

| Species name                                                                                                                                                                                                                                                                                | Herbarium code | Locality code | Year |
|---------------------------------------------------------------------------------------------------------------------------------------------------------------------------------------------------------------------------------------------------------------------------------------------|----------------|---------------|------|
| <b>Absconditella lignicola Vězda et Pišút</b>                                                                                                                                                                                                                                               |                |               |      |
| [72] Farkas, E.; Lőkös, L. (2021): Distribution of <i>Absconditella lignicola</i> (Stictidaceae, lichenized Ascomycetes) in Hungary. – <i>Studia bot. hung.</i> 52(2): 115–124. <a href="https://doi.org/10.17110/StudBot.2021.52.2.115">https://doi.org/10.17110/StudBot.2021.52.2.115</a> |                |               |      |
| <b>Coenogonium pineti (Ach.) Lücking et Lumbsch</b>                                                                                                                                                                                                                                         |                |               |      |
| Coenogonium pineti (Ach.) Lücking et Lumbsch                                                                                                                                                                                                                                                | BP             | 9371.3        | 1954 |
| Coenogonium pineti (Ach.) Lücking et Lumbsch                                                                                                                                                                                                                                                | BP             | 8085.3        | 1974 |
| Coenogonium pineti (Ach.) Lücking et Lumbsch                                                                                                                                                                                                                                                | BP             | 8085.3        | 1981 |
| Coenogonium pineti (Ach.) Lücking et Lumbsch                                                                                                                                                                                                                                                | BP             | 0071.1        | 1988 |
| Coenogonium pineti (Ach.) Lücking et Lumbsch                                                                                                                                                                                                                                                | BP             | 9773.3        | 1988 |
| Coenogonium pineti (Ach.) Lücking et Lumbsch                                                                                                                                                                                                                                                | BP             | 8070.3        | 1991 |
| Coenogonium pineti (Ach.) Lücking et Lumbsch                                                                                                                                                                                                                                                | BP             | 8965.3        | 1993 |
| Coenogonium pineti (Ach.) Lücking et Lumbsch                                                                                                                                                                                                                                                | BP             | 9162.2        | 1993 |
| Coenogonium pineti (Ach.) Lücking et Lumbsch                                                                                                                                                                                                                                                | BP             | 9063.3        | 1994 |
| Coenogonium pineti (Ach.) Lücking et Lumbsch                                                                                                                                                                                                                                                | BP             | 0071.1        | 1996 |
| Coenogonium pineti (Ach.) Lücking et Lumbsch                                                                                                                                                                                                                                                | BP             | 8089.3        | 1998 |
| Coenogonium pineti (Ach.) Lücking et Lumbsch                                                                                                                                                                                                                                                | BP             | 9169.4        | 1998 |
| Coenogonium pineti (Ach.) Lücking et Lumbsch                                                                                                                                                                                                                                                | BP             | 7489.4        | 1998 |
| Coenogonium pineti (Ach.) Lücking et Lumbsch                                                                                                                                                                                                                                                | BP             | 9293.3        | 1998 |
| Coenogonium pineti (Ach.) Lücking et Lumbsch                                                                                                                                                                                                                                                | BP             | 7489.3        | 1999 |
| Coenogonium pineti (Ach.) Lücking et Lumbsch                                                                                                                                                                                                                                                | BP             | 8381.1        | 1999 |
| Coenogonium pineti (Ach.) Lücking et Lumbsch                                                                                                                                                                                                                                                | BP             | 8278.4        | 1999 |
| Coenogonium pineti (Ach.) Lücking et Lumbsch                                                                                                                                                                                                                                                | BP             | 7489.3        | 1999 |
| Coenogonium pineti (Ach.) Lücking et Lumbsch                                                                                                                                                                                                                                                | BP             | 9170.4        | 1999 |
| Coenogonium pineti (Ach.) Lücking et Lumbsch                                                                                                                                                                                                                                                | BP             | 8782.1        | 2000 |
| Coenogonium pineti (Ach.) Lücking et Lumbsch                                                                                                                                                                                                                                                | BP             | 7990.1        | 2000 |
| Coenogonium pineti (Ach.) Lücking et Lumbsch                                                                                                                                                                                                                                                | BP             | 0175.2        | 2000 |
| Coenogonium pineti (Ach.) Lücking et Lumbsch                                                                                                                                                                                                                                                | BP             | 8380.1        | 2000 |
| Coenogonium pineti (Ach.) Lücking et Lumbsch                                                                                                                                                                                                                                                | BP             | 7989.4        | 2001 |
| Coenogonium pineti (Ach.) Lücking et Lumbsch                                                                                                                                                                                                                                                | BP             | 8874.4        | 2001 |
| Coenogonium pineti (Ach.) Lücking et Lumbsch                                                                                                                                                                                                                                                | BP             | 8480.3        | 2001 |
| Coenogonium pineti (Ach.) Lücking et Lumbsch                                                                                                                                                                                                                                                | BP             | 7990.3        | 2001 |
| Coenogonium pineti (Ach.) Lücking et Lumbsch                                                                                                                                                                                                                                                | BP             | 8579.2        | 2002 |
| Coenogonium pineti (Ach.) Lücking et Lumbsch                                                                                                                                                                                                                                                | BP             | 7794.1        | 2002 |
| Coenogonium pineti (Ach.) Lücking et Lumbsch                                                                                                                                                                                                                                                | BP             | 8479.1        | 2002 |
| Coenogonium pineti (Ach.) Lücking et Lumbsch                                                                                                                                                                                                                                                | BP             | 8079.2        | 2002 |
| Coenogonium pineti (Ach.) Lücking et Lumbsch                                                                                                                                                                                                                                                | BP             | 8079.4        | 2002 |
| Coenogonium pineti (Ach.) Lücking et Lumbsch                                                                                                                                                                                                                                                | BP             | 7793.2        | 2002 |

|                                              |       |        |      |
|----------------------------------------------|-------|--------|------|
| Coenogonium pineti (Ach.) Lücking et Lumbsch | BP    | 8579.2 | 2002 |
| Coenogonium pineti (Ach.) Lücking et Lumbsch | BP    | 9173.2 | 2003 |
| Coenogonium pineti (Ach.) Lücking et Lumbsch | BP    | 8480.3 | 2003 |
| Coenogonium pineti (Ach.) Lücking et Lumbsch | BP    | 7494.2 | 2004 |
| Coenogonium pineti (Ach.) Lücking et Lumbsch | BP    | 9065.3 | 2004 |
| Coenogonium pineti (Ach.) Lücking et Lumbsch | BP    | 7594.1 | 2004 |
| Coenogonium pineti (Ach.) Lücking et Lumbsch | BP    | 7494.4 | 2004 |
| Coenogonium pineti (Ach.) Lücking et Lumbsch | BP    | 9466.1 | 2005 |
| Coenogonium pineti (Ach.) Lücking et Lumbsch | BP    | 8365.1 | 2005 |
| Coenogonium pineti (Ach.) Lücking et Lumbsch | BP    | 8364.2 | 2005 |
| Coenogonium pineti (Ach.) Lücking et Lumbsch | BP    | 7594.4 | 2006 |
| Coenogonium pineti (Ach.) Lücking et Lumbsch | BP    | 7594.4 | 2006 |
| Coenogonium pineti (Ach.) Lücking et Lumbsch | BP    | 8181.3 | 2007 |
| Coenogonium pineti (Ach.) Lücking et Lumbsch | BP    | 8181.3 | 2007 |
| Coenogonium pineti (Ach.) Lücking et Lumbsch | BP    | 8180.4 | 2007 |
| Coenogonium pineti (Ach.) Lücking et Lumbsch | BP    | 8181.3 | 2007 |
| Coenogonium pineti (Ach.) Lücking et Lumbsch | BP    | 8280.3 | 2008 |
| Coenogonium pineti (Ach.) Lücking et Lumbsch | BP    | 8278.4 | 2008 |
| Coenogonium pineti (Ach.) Lücking et Lumbsch | BP    | 8280.3 | 2008 |
| Coenogonium pineti (Ach.) Lücking et Lumbsch | BP    | 8279.4 | 2008 |
| Coenogonium pineti (Ach.) Lücking et Lumbsch | BP    | 8279.4 | 2008 |
| Coenogonium pineti (Ach.) Lücking et Lumbsch | BP    | 9171.1 | 2009 |
| Coenogonium pineti (Ach.) Lücking et Lumbsch | BP    | 9071.4 | 2009 |
| Coenogonium pineti (Ach.) Lücking et Lumbsch | BP    | 9164.3 | 2009 |
| Coenogonium pineti (Ach.) Lücking et Lumbsch | BP    | 8185.2 | 2009 |
| Coenogonium pineti (Ach.) Lücking et Lumbsch | BP    | 8185.2 | 2009 |
| Coenogonium pineti (Ach.) Lücking et Lumbsch | BP    | 7989.3 | 2010 |
| Coenogonium pineti (Ach.) Lücking et Lumbsch | BP    | 8479.2 | 2011 |
| Coenogonium pineti (Ach.) Lücking et Lumbsch | BP    | 8597.2 | 2013 |
| Coenogonium pineti (Ach.) Lücking et Lumbsch | BP    | 8597.2 | 2013 |
| Coenogonium pineti (Ach.) Lücking et Lumbsch | BP    | 8379.1 | 2014 |
| Coenogonium pineti (Ach.) Lücking et Lumbsch | BP    | 9975.1 | 2014 |
| Coenogonium pineti (Ach.) Lücking et Lumbsch | BP    | 8874.3 | 2014 |
| Coenogonium pineti (Ach.) Lücking et Lumbsch | BMCRY | 9072.4 | 2015 |
| Coenogonium pineti (Ach.) Lücking et Lumbsch | BMCRY | 8973.3 | 2015 |
| Coenogonium pineti (Ach.) Lücking et Lumbsch | BMCRY | 9072.2 | 2015 |
| Coenogonium pineti (Ach.) Lücking et Lumbsch | BMCRY | 8973.4 | 2015 |
| Coenogonium pineti (Ach.) Lücking et Lumbsch | BP    | 8680.2 | 2015 |
| Coenogonium pineti (Ach.) Lücking et Lumbsch | BP    | 8580.4 | 2015 |
| Coenogonium pineti (Ach.) Lücking et Lumbsch | BMCRY | 8773.1 | 2015 |
| Coenogonium pineti (Ach.) Lücking et Lumbsch | BP    | 0071.1 | 2015 |
| Coenogonium pineti (Ach.) Lücking et Lumbsch | BMCRY | 9072.3 | 2015 |
| Coenogonium pineti (Ach.) Lücking et Lumbsch | BMCRY | 9073.1 | 2015 |
| Coenogonium pineti (Ach.) Lücking et Lumbsch | BMCRY | 8973.3 | 2015 |
| Coenogonium pineti (Ach.) Lücking et Lumbsch | BMCRY | 8974.1 | 2015 |
| Coenogonium pineti (Ach.) Lücking et Lumbsch | BMCRY | 9073.1 | 2015 |

|                                              |       |        |      |
|----------------------------------------------|-------|--------|------|
| Coenogonium pineti (Ach.) Lücking et Lumbsch | BMCRY | 8973.3 | 2015 |
| Coenogonium pineti (Ach.) Lücking et Lumbsch | BMCRY | 8672.2 | 2016 |
| Coenogonium pineti (Ach.) Lücking et Lumbsch | BMCRY | 9171.1 | 2016 |
| Coenogonium pineti (Ach.) Lücking et Lumbsch | BMCRY | 9171.1 | 2016 |
| Coenogonium pineti (Ach.) Lücking et Lumbsch | BMCRY | 9071.4 | 2016 |
| Coenogonium pineti (Ach.) Lücking et Lumbsch | BP    | 8773.3 | 2017 |
| Coenogonium pineti (Ach.) Lücking et Lumbsch | BP    | 8179.2 | 2017 |
| Coenogonium pineti (Ach.) Lücking et Lumbsch | BP    | 9465.2 | 2017 |
| Coenogonium pineti (Ach.) Lücking et Lumbsch | BP    | 9567.1 | 2017 |
| Coenogonium pineti (Ach.) Lücking et Lumbsch | BP    | 9367.3 | 2017 |
| Coenogonium pineti (Ach.) Lücking et Lumbsch | BP    | 8380.2 | 2018 |
| Coenogonium pineti (Ach.) Lücking et Lumbsch | BP    | 8673.3 | 2018 |
| Coenogonium pineti (Ach.) Lücking et Lumbsch | BP    | 8782.1 | 2021 |
| Coenogonium pineti (Ach.) Lücking et Lumbsch | BP    | 8479.4 | 2021 |
| Coenogonium pineti (Ach.) Lücking et Lumbsch | BP    | 9365.1 | 2021 |
| Coenogonium pineti (Ach.) Lücking et Lumbsch | BP    | 9265.3 | 2021 |
| Coenogonium pineti (Ach.) Lücking et Lumbsch | BP    | 9365.1 | 2021 |
| Coenogonium pineti (Ach.) Lücking et Lumbsch | BP    | 8180.1 | 2021 |
| Coenogonium pineti (Ach.) Lücking et Lumbsch | BP    | 9170.4 | 2022 |
| Coenogonium pineti (Ach.) Lücking et Lumbsch | BP    | 8482.1 | 2022 |
| Coenogonium pineti (Ach.) Lücking et Lumbsch | BP    | 8477.3 | 2022 |
| Coenogonium pineti (Ach.) Lücking et Lumbsch | BP    | 8479.2 | 2022 |

---

#### **Evernia divaricata (L.) Ach.**

|                              |       |        |      |
|------------------------------|-------|--------|------|
| Evernia divaricata (L.) Ach. | BP    | 9083.1 | 2009 |
| Evernia divaricata (L.) Ach. | CBFS  | 9071.4 | 2009 |
| Evernia divaricata (L.) Ach. | BP    | 8579.2 | 2001 |
| Evernia divaricata (L.) Ach. | BP    | 7989.2 | 1932 |
| Evernia divaricata (L.) Ach. | BP    | 7988.2 | 2006 |
| Evernia divaricata (L.) Ach. | BP    | 9173.2 | 2003 |
| Evernia divaricata (L.) Ach. | BP    | 8682.3 | 1925 |
| Evernia divaricata (L.) Ach. | BP    | 8085.4 | 1925 |
| Evernia divaricata (L.) Ach. | BP    | 8398.4 | 2012 |
| Evernia divaricata (L.) Ach. | BP    | 8380.3 | 2012 |
| Evernia divaricata (L.) Ach. | BP    | 8777.2 | 1866 |
| Evernia divaricata (L.) Ach. | BP    | 0176.1 | 2000 |
| Evernia divaricata (L.) Ach. | BP    | 7594.1 | 2006 |
| Evernia divaricata (L.) Ach. | DE    | 8597.2 | 2013 |
| Evernia divaricata (L.) Ach. | DE    | 8497.4 | 2013 |
| Evernia divaricata (L.) Ach. | BMCRY | 8673.3 | 2014 |
| Evernia divaricata (L.) Ach. | BMCRY | 9171.4 | 2016 |
| Evernia divaricata (L.) Ach. | BMCRY | 9171.4 | 2018 |
| Evernia divaricata (L.) Ach. | BMCRY | 9171.2 | 2016 |
| Evernia divaricata (L.) Ach. | BMCRY | 8773.3 | 2015 |

|                              |       |        |      |
|------------------------------|-------|--------|------|
| Evernia divaricata (L.) Ach. | BMCRY | 8772.4 | 2018 |
| Evernia divaricata (L.) Ach. | BMCRY | 9071.4 | 2016 |
| Evernia divaricata (L.) Ach. | DE    | 8398.3 | 2020 |
| Evernia divaricata (L.) Ach. | DE    | 8398.4 | 2012 |
| Evernia divaricata (L.) Ach. | DE    | 8398.4 | 2013 |
| Evernia divaricata (L.) Ach. | DE    | 8596.4 | 2014 |
| Evernia divaricata (L.) Ach. | DE    | 8497.4 | 2014 |
| Evernia divaricata (L.) Ach. | DE    | 8497.4 | 2015 |
| Evernia divaricata (L.) Ach. | DE    | 8497.4 | 2016 |
| Evernia divaricata (L.) Ach. | DE    | 7594.3 | 2018 |
| Evernia divaricata (L.) Ach. | DE    | 7494.2 | 2018 |
| Evernia divaricata (L.) Ach. | DE    | 7494.2 | 2019 |
| Evernia divaricata (L.) Ach. | DE    | 7494.3 | 2019 |
| Evernia divaricata (L.) Ach. | DE    | 7494.2 | 2017 |
| Evernia divaricata (L.) Ach. | DE    | 8497.2 | 2022 |

---

### **Flavoparmelia soledians (Nyl.) Hale**

[65] Farkas, E.; Lajtha-Tabajdi, Á.; Lőkös, L.; Molnár, K.; Paczkó, L.; Sinigla, M. Flavoparmelia soledians (Parmeliaceae, lichenised Ascomycetes), a spreading lichen species in Hungary. *Studia bot. hung.* 2016, 47(1), 5–12. <https://doi.org/10.17110/studbot.2016.47.1.5>

|                                     |    |        |      |
|-------------------------------------|----|--------|------|
| Flavoparmelia soledians (Nyl.) Hale | BP | 8476.4 | 2017 |
| Flavoparmelia soledians (Nyl.) Hale | BP | 9384.3 | 2020 |
| Flavoparmelia soledians (Nyl.) Hale | BP | 9569.2 | 2022 |
| Flavoparmelia soledians (Nyl.) Hale | BP | 8480.3 | 2022 |

---

### **Hyperphyscia adglutinata (Flörke) H. Mayrhofer et Poelt**

|                                                         |    |        |      |
|---------------------------------------------------------|----|--------|------|
| Hyperphyscia adglutinata (Flörke) H. Mayrhofer et Poelt | BP | 0176.2 | 1925 |
| Hyperphyscia adglutinata (Flörke) H. Mayrhofer et Poelt | BP | 9371.4 | 1954 |
| Hyperphyscia adglutinata (Flörke) H. Mayrhofer et Poelt | BP | 8772.1 | 1957 |
| Hyperphyscia adglutinata (Flörke) H. Mayrhofer et Poelt | BP | 9073.1 | 1960 |
| Hyperphyscia adglutinata (Flörke) H. Mayrhofer et Poelt | BP | 0176.1 | 2000 |
| Hyperphyscia adglutinata (Flörke) H. Mayrhofer et Poelt | BP | 9873.4 | 2008 |
| Hyperphyscia adglutinata (Flörke) H. Mayrhofer et Poelt | BP | 8480.3 | 2009 |
| Hyperphyscia adglutinata (Flörke) H. Mayrhofer et Poelt | BP | 9083.3 | 2009 |
| Hyperphyscia adglutinata (Flörke) H. Mayrhofer et Poelt | BP | 8966.3 | 2010 |
| Hyperphyscia adglutinata (Flörke) H. Mayrhofer et Poelt | BP | 8278.3 | 2011 |
| Hyperphyscia adglutinata (Flörke) H. Mayrhofer et Poelt | BP | 9073.1 | 2011 |
| Hyperphyscia adglutinata (Flörke) H. Mayrhofer et Poelt | BP | 8580.2 | 2011 |
| Hyperphyscia adglutinata (Flörke) H. Mayrhofer et Poelt | BP | 8580.2 | 2011 |
| Hyperphyscia adglutinata (Flörke) H. Mayrhofer et Poelt | BP | 8581.3 | 2011 |
| Hyperphyscia adglutinata (Flörke) H. Mayrhofer et Poelt | BP | 8581.3 | 2011 |

|                                                         |       |        |      |
|---------------------------------------------------------|-------|--------|------|
| Hyperphyscia adglutinata (Flörke) H. Mayrhofer et Poelt | BP    | 9073.3 | 2012 |
| Hyperphyscia adglutinata (Flörke) H. Mayrhofer et Poelt | BP    | 9185.2 | 2012 |
| Hyperphyscia adglutinata (Flörke) H. Mayrhofer et Poelt | BP    | 8270.3 | 2012 |
| Hyperphyscia adglutinata (Flörke) H. Mayrhofer et Poelt | BP    | 9974.2 | 2013 |
| Hyperphyscia adglutinata (Flörke) H. Mayrhofer et Poelt | BP    | 8497.4 | 2013 |
| Hyperphyscia adglutinata (Flörke) H. Mayrhofer et Poelt | BP    | 8498.2 | 2013 |
| Hyperphyscia adglutinata (Flörke) H. Mayrhofer et Poelt | BP    | 8496.4 | 2013 |
| Hyperphyscia adglutinata (Flörke) H. Mayrhofer et Poelt | BP    | 8597.3 | 2013 |
| Hyperphyscia adglutinata (Flörke) H. Mayrhofer et Poelt | BP    | 8580.4 | 2013 |
| Hyperphyscia adglutinata (Flörke) H. Mayrhofer et Poelt | JPU   | 9975.1 | 2014 |
| Hyperphyscia adglutinata (Flörke) H. Mayrhofer et Poelt | BP    | 8480.3 | 2014 |
| Hyperphyscia adglutinata (Flörke) H. Mayrhofer et Poelt | BP    | 8874.3 | 2014 |
| Hyperphyscia adglutinata (Flörke) H. Mayrhofer et Poelt | BP    | 8381.3 | 2014 |
| Hyperphyscia adglutinata (Flörke) H. Mayrhofer et Poelt | BP    | 9273.1 | 2014 |
| Hyperphyscia adglutinata (Flörke) H. Mayrhofer et Poelt | BMCRY | 8973.3 | 2015 |
| Hyperphyscia adglutinata (Flörke) H. Mayrhofer et Poelt | BMCRY | 8974.1 | 2015 |
| Hyperphyscia adglutinata (Flörke) H. Mayrhofer et Poelt | BMCRY | 9072.4 | 2015 |
| Hyperphyscia adglutinata (Flörke) H. Mayrhofer et Poelt | BMCRY | 9072.4 | 2015 |
| Hyperphyscia adglutinata (Flörke) H. Mayrhofer et Poelt | BMCRY | 9171.1 | 2016 |
| Hyperphyscia adglutinata (Flörke) H. Mayrhofer et Poelt | BP    | 9680.2 | 2016 |
| Hyperphyscia adglutinata (Flörke) H. Mayrhofer et Poelt | BP    | 8580.1 | 2016 |
| Hyperphyscia adglutinata (Flörke) H. Mayrhofer et Poelt | BP    | 9580.4 | 2016 |
| Hyperphyscia adglutinata (Flörke) H. Mayrhofer et Poelt | BP    | 9680.2 | 2016 |
| Hyperphyscia adglutinata (Flörke) H. Mayrhofer et Poelt | BP    | 8579.2 | 2017 |
| Hyperphyscia adglutinata (Flörke) H. Mayrhofer et Poelt | BP    | 9367.3 | 2017 |
| Hyperphyscia adglutinata (Flörke) H. Mayrhofer et Poelt | BP    | 8479.4 | 2017 |
| Hyperphyscia adglutinata (Flörke) H. Mayrhofer et Poelt | BP    | 9171.1 | 2017 |
| Hyperphyscia adglutinata (Flörke) H. Mayrhofer et Poelt | BP    | 8480.3 | 2017 |
| Hyperphyscia adglutinata (Flörke) H. Mayrhofer et Poelt | BP    | 8782.1 | 2021 |
| Hyperphyscia adglutinata (Flörke) H. Mayrhofer et Poelt | BP    | 8479.2 | 2021 |
| Hyperphyscia adglutinata (Flörke) H. Mayrhofer et Poelt | BP    | 8782.1 | 2021 |
| Hyperphyscia adglutinata (Flörke) H. Mayrhofer et Poelt | BP    | 8580.2 | 2021 |
| Hyperphyscia adglutinata (Flörke) H. Mayrhofer et Poelt | BP    | 8782.1 | 2021 |
| Hyperphyscia adglutinata (Flörke) H. Mayrhofer et Poelt | BP    | 0176.2 | 2021 |
| Hyperphyscia adglutinata (Flörke) H. Mayrhofer et Poelt | BP    | 9769.1 | 2021 |
| Hyperphyscia adglutinata (Flörke) H. Mayrhofer et Poelt | BP    | 9265.3 | 2021 |
| Hyperphyscia adglutinata (Flörke) H. Mayrhofer et Poelt | BP    | 0176.2 | 2021 |
| Hyperphyscia adglutinata (Flörke) H. Mayrhofer et Poelt | BP    | 9383.2 | 2021 |
| Hyperphyscia adglutinata (Flörke) H. Mayrhofer et Poelt | BP    | 9170.4 | 2022 |
| Hyperphyscia adglutinata (Flörke) H. Mayrhofer et Poelt | BP    | 8880.3 | 2019 |
| Hyperphyscia adglutinata (Flörke) H. Mayrhofer et Poelt | BMCRY | 8280.4 | 2018 |

## **Lobaria pulmonaria L.**

[63] Farkas, E.; Lőkös, L. *Lobaria pulmonaria* (lichen-forming fungi) in Hungary. (A tüdőzuzmó (*Lobaria pulmonaria*) elterjedése Magyarországon). Mikol. Közlem., Clusiana 2009, 48(1), 11–18.

|                              |    |        |      |
|------------------------------|----|--------|------|
| <i>Lobaria pulmonaria</i> L. | BP | 7989.3 | 2016 |
| <i>Lobaria pulmonaria</i> L. | BP | 7989.3 | 2016 |

### **Menegazzia terebrata (Hoffm.) A. Massal.**

[49] Verseghe, K. Magyarország zuzmóflórájának kézikönyve. Magyar Természettudományi Múzeum: Budapest, Hungary, 1994; pp. 1–415.

|                                                 |    |        |      |
|-------------------------------------------------|----|--------|------|
| <i>Menegazzia terebrata</i> (Hoffm.) A. Massal. | BP | 7594.4 | 1997 |
|-------------------------------------------------|----|--------|------|

### **Physcia aipolioides (Nádv.) Breuss et Türk**

[71] Lisická, E.; Lackovičová, A.; Liška, J.; Lőkös, L.; Lisický, M.J. *Physcia aipolioides* – ein Beispiel einer invasiven Flechte oder einer unterschätzten Verbreitung? (*Physcia aipolioides* – an example of an invasive lichen or an underestimated distribution?). Sauteria 2008, 15, 303–318.

|                                                   |    |        |      |
|---------------------------------------------------|----|--------|------|
| <i>Physcia aipolioides</i> (Nádv.) Breuss et Türk | BP | 9073.3 | 1954 |
| <i>Physcia aipolioides</i> (Nádv.) Breuss et Türk | BP | 9073.3 | 1954 |
| <i>Physcia aipolioides</i> (Nádv.) Breuss et Türk | BP | 9269.1 | 1957 |
| <i>Physcia aipolioides</i> (Nádv.) Breuss et Türk | BP | 9074.3 | 1958 |
| <i>Physcia aipolioides</i> (Nádv.) Breuss et Türk | BP | 9074.3 | 1958 |
| <i>Physcia aipolioides</i> (Nádv.) Breuss et Türk | BP | 8365.1 | 1961 |
| <i>Physcia aipolioides</i> (Nádv.) Breuss et Türk | BP | 8265.4 | 1961 |
| <i>Physcia aipolioides</i> (Nádv.) Breuss et Türk | BP | 8367.3 | 1961 |
| <i>Physcia aipolioides</i> (Nádv.) Breuss et Türk | BP | 9169.3 | 1961 |
| <i>Physcia aipolioides</i> (Nádv.) Breuss et Türk | BP | 9269.2 | 1961 |
| <i>Physcia aipolioides</i> (Nádv.) Breuss et Türk | BP | 9073.1 | 1961 |
| <i>Physcia aipolioides</i> (Nádv.) Breuss et Türk | BP | 8365.1 | 1963 |
| <i>Physcia aipolioides</i> (Nádv.) Breuss et Türk | BP | 9073.1 | 1964 |
| <i>Physcia aipolioides</i> (Nádv.) Breuss et Türk | BP | 8279.1 | 1986 |
| <i>Physcia aipolioides</i> (Nádv.) Breuss et Türk | BP | 8374.2 | 1999 |
| <i>Physcia aipolioides</i> (Nádv.) Breuss et Türk | BP | 8374.2 | 1999 |
| <i>Physcia aipolioides</i> (Nádv.) Breuss et Türk | BP | 8275.3 | 1999 |
| <i>Physcia aipolioides</i> (Nádv.) Breuss et Türk | BP | 8274.3 | 1999 |
| <i>Physcia aipolioides</i> (Nádv.) Breuss et Türk | BP | 0175.2 | 2000 |
| <i>Physcia aipolioides</i> (Nádv.) Breuss et Türk | BP | 9269.1 | 2003 |
| <i>Physcia aipolioides</i> (Nádv.) Breuss et Türk | BP | 8874.3 | 2007 |
| <i>Physcia aipolioides</i> (Nádv.) Breuss et Türk | BP | 8180.4 | 2007 |
| <i>Physcia aipolioides</i> (Nádv.) Breuss et Türk | BP | 8396.2 | 2013 |
| <i>Physcia aipolioides</i> (Nádv.) Breuss et Türk | DE | 8396.1 | 2013 |

|                                             |    |        |      |
|---------------------------------------------|----|--------|------|
| Physcia aipolioides (Nád.v.) Breuss et Türk | BP | 9074.2 | 2015 |
| Physcia aipolioides (Nád.v.) Breuss et Türk | BP | 8368.3 | 2022 |
| Physcia aipolioides (Nád.v.) Breuss et Türk | BP | 8480.3 | 2022 |
| Physcia aipolioides (Nád.v.) Breuss et Türk | BP | 8480.3 | 2022 |
| Physcia aipolioides (Nád.v.) Breuss et Türk | BP | 9974.2 | 2013 |
| Physcia aipolioides (Nád.v.) Breuss et Türk | BP | 9582.2 | 2012 |
| Physcia aipolioides (Nád.v.) Breuss et Türk | BP | 9170.4 | 2014 |

### **Piccolia ochrophora (Nyl.) Hafellner**

|                                      |        |        |      |
|--------------------------------------|--------|--------|------|
| Piccolia ochrophora (Nyl.) Hafellner | BP     | 8379.1 | 2014 |
| Piccolia ochrophora (Nyl.) Hafellner | BP     | 8480.3 | 2013 |
| Piccolia ochrophora (Nyl.) Hafellner | BP     | 8378.2 | 2014 |
| Piccolia ochrophora (Nyl.) Hafellner | BP     | 8580.4 | 2004 |
| Piccolia ochrophora (Nyl.) Hafellner | VBI, S | 9182.2 | 1987 |
| Piccolia ochrophora (Nyl.) Hafellner | CBFS   | 7988.2 | 2006 |
| Piccolia ochrophora (Nyl.) Hafellner | BP     | 8278.3 | 2011 |
| Piccolia ochrophora (Nyl.) Hafellner | BP     | 8096.1 | 2010 |
| Piccolia ochrophora (Nyl.) Hafellner | BP     | 9171.1 | 2009 |
| Piccolia ochrophora (Nyl.) Hafellner | BP     | 8381.3 | 2014 |
| Piccolia ochrophora (Nyl.) Hafellner | BMCRY  | 8476.4 | 2016 |
| Piccolia ochrophora (Nyl.) Hafellner | BMCRY  | 8380.4 | 2018 |
| Piccolia ochrophora (Nyl.) Hafellner | BP     | 8498.2 | 2013 |
| Piccolia ochrophora (Nyl.) Hafellner | BP     | 8680.2 | 2013 |
| Piccolia ochrophora (Nyl.) Hafellner | BP     | 8580.4 | 2013 |
| Piccolia ochrophora (Nyl.) Hafellner | BP     | 9367.3 | 2017 |

### **Scoliciosporum chlorococcum (Stenh.) Vězda**

[49] Verseghe, K. Magyarország zuzmóflórájának kézikönyve. Magyar Természettudományi Múzeum: Budapest, Hungary, 1994; pp. 1–415.

[70] Lőkös, L. A Bacidia s. l. zuzmónemzetség hazai fajainak taxonómiai revíziója. [Taxonomic revision of the Bacidia s. l. species in Hungary.] PhD Thesis, PTE, Pécs, Hungary, 2005; pp. 1–158.

|                                            |       |        |      |
|--------------------------------------------|-------|--------|------|
| Scoliciosporum chlorococcum (Stenh.) Vězda | BMCRY | 9171.2 | 2013 |
| Scoliciosporum chlorococcum (Stenh.) Vězda | BMCRY | 8773.3 | 2013 |
| Scoliciosporum chlorococcum (Stenh.) Vězda | BMCRY | 9170.3 | 2014 |
| Scoliciosporum chlorococcum (Stenh.) Vězda | BMCRY | 8572.1 | 2014 |
| Scoliciosporum chlorococcum (Stenh.) Vězda | BMCRY | 9072.3 | 2015 |
| Scoliciosporum chlorococcum (Stenh.) Vězda | BMCRY | 9072.4 | 2015 |
| Scoliciosporum chlorococcum (Stenh.) Vězda | BMCRY | 9072.2 | 2015 |
| Scoliciosporum chlorococcum (Stenh.) Vězda | BMCRY | 9071.4 | 2016 |
| Scoliciosporum chlorococcum (Stenh.) Vězda | BMCRY | 9171.1 | 2016 |
| Scoliciosporum chlorococcum (Stenh.) Vězda | BMCRY | 9171.2 | 2016 |
| Scoliciosporum chlorococcum (Stenh.) Vězda | BMCRY | 9171.1 | 2016 |

---

**Solenopsora candicans (Dicks.) J. Steiner**

[69] Farkas, E.; Guttová, A.; Lőkös, L.; Molnár, K. Distribution of *Solenopsora candicans* (lichen-forming fungi, Catillariaceae) in Hungary. *Acta Bot. Hung.* 2011, 53(3–4), 305–311. <https://doi.org/10.1556/abot.53.2011.3-4.12>

---

*Solenopsora candicans* (Dicks.) J. Steiner

BMCRY

9070.2

2015

---

**Straminella conizaeoides (Cromb.) S. Y. Kondr., Lőkös et Farkas**

[49] Verseghe, K. Magyarország zuzmóflórájának kézikönyve. Magyar Természettudományi Múzeum: Budapest, Hungary, 1994; pp. 1–415.

|                                                                        |     |        |      |
|------------------------------------------------------------------------|-----|--------|------|
| <i>Straminella conizaeoides</i> (Cromb.) S. Y. Kondr., Lőkös et Farkas | BP  | 7688.4 | 1995 |
| <i>Straminella conizaeoides</i> (Cromb.) S. Y. Kondr., Lőkös et Farkas | BP  | 8285.1 | 1996 |
| <i>Straminella conizaeoides</i> (Cromb.) S. Y. Kondr., Lőkös et Farkas | BP  | 8974.1 | 1997 |
| <i>Straminella conizaeoides</i> (Cromb.) S. Y. Kondr., Lőkös et Farkas | BP  | 9170.4 | 1997 |
| <i>Straminella conizaeoides</i> (Cromb.) S. Y. Kondr., Lőkös et Farkas | BP  | 8274.2 | 1998 |
| <i>Straminella conizaeoides</i> (Cromb.) S. Y. Kondr., Lőkös et Farkas | BP  | 7589.1 | 1998 |
| <i>Straminella conizaeoides</i> (Cromb.) S. Y. Kondr., Lőkös et Farkas | BP  | 8274.2 | 1998 |
| <i>Straminella conizaeoides</i> (Cromb.) S. Y. Kondr., Lőkös et Farkas | BP  | 9170.2 | 1999 |
| <i>Straminella conizaeoides</i> (Cromb.) S. Y. Kondr., Lőkös et Farkas | BP  | 8274.2 | 1999 |
| <i>Straminella conizaeoides</i> (Cromb.) S. Y. Kondr., Lőkös et Farkas | BP  | 8480.3 | 1999 |
| <i>Straminella conizaeoides</i> (Cromb.) S. Y. Kondr., Lőkös et Farkas | BP  | 8274.2 | 1999 |
| <i>Straminella conizaeoides</i> (Cromb.) S. Y. Kondr., Lőkös et Farkas | BP  | 9170.3 | 1999 |
| <i>Straminella conizaeoides</i> (Cromb.) S. Y. Kondr., Lőkös et Farkas | BP  | 7589.1 | 2000 |
| <i>Straminella conizaeoides</i> (Cromb.) S. Y. Kondr., Lőkös et Farkas | BP  | 0175.2 | 2000 |
| <i>Straminella conizaeoides</i> (Cromb.) S. Y. Kondr., Lőkös et Farkas | BP  | 8480.3 | 2000 |
| <i>Straminella conizaeoides</i> (Cromb.) S. Y. Kondr., Lőkös et Farkas | BP  | 8281.3 | 2000 |
| <i>Straminella conizaeoides</i> (Cromb.) S. Y. Kondr., Lőkös et Farkas | BP  | 8379.3 | 2001 |
| <i>Straminella conizaeoides</i> (Cromb.) S. Y. Kondr., Lőkös et Farkas | BP  | 8382.3 | 2001 |
| <i>Straminella conizaeoides</i> (Cromb.) S. Y. Kondr., Lőkös et Farkas | EGR | 7884.4 | 2001 |
| <i>Straminella conizaeoides</i> (Cromb.) S. Y. Kondr., Lőkös et Farkas | BP  | 8379.3 | 2001 |
| <i>Straminella conizaeoides</i> (Cromb.) S. Y. Kondr., Lőkös et Farkas | BP  | 8579.2 | 2002 |
| <i>Straminella conizaeoides</i> (Cromb.) S. Y. Kondr., Lőkös et Farkas | BP  | 8479.4 | 2002 |
| <i>Straminella conizaeoides</i> (Cromb.) S. Y. Kondr., Lőkös et Farkas | BP  | 8479.4 | 2002 |
| <i>Straminella conizaeoides</i> (Cromb.) S. Y. Kondr., Lőkös et Farkas | EGR | 7988.1 | 2003 |
| <i>Straminella conizaeoides</i> (Cromb.) S. Y. Kondr., Lőkös et Farkas | EGR | 8186.3 | 2004 |
| <i>Straminella conizaeoides</i> (Cromb.) S. Y. Kondr., Lőkös et Farkas | EGR | 8088.2 | 2004 |

---

**Xanthoria parietina (L.) Th. Fr.**

[49] Versegly, K. Magyarország zuzmóflórájának kézikönyve. Magyar Természettudományi Múzeum: Budapest, Hungary, 1994; pp. 1–415.

|                                  |    |        |      |
|----------------------------------|----|--------|------|
| Xanthoria parietina (L.) Th. Fr. | BP | 8299.3 | 1997 |
| Xanthoria parietina (L.) Th. Fr. | BP | 8275.3 | 1998 |
| Xanthoria parietina (L.) Th. Fr. | BP | 8275.3 | 1998 |
| Xanthoria parietina (L.) Th. Fr. | BP | 8275.3 | 1998 |
| Xanthoria parietina (L.) Th. Fr. | BP | 8274.4 | 1998 |
| Xanthoria parietina (L.) Th. Fr. | BP | 8274.4 | 1998 |
| Xanthoria parietina (L.) Th. Fr. | BP | 8274.4 | 1998 |
| Xanthoria parietina (L.) Th. Fr. | BP | 8274.4 | 1998 |
| Xanthoria parietina (L.) Th. Fr. | BP | 8274.4 | 1998 |
| Xanthoria parietina (L.) Th. Fr. | BP | 8274.4 | 1998 |
| Xanthoria parietina (L.) Th. Fr. | BP | 8274.4 | 1998 |
| Xanthoria parietina (L.) Th. Fr. | BP | 8274.1 | 1998 |
| Xanthoria parietina (L.) Th. Fr. | BP | 8274.3 | 1998 |
| Xanthoria parietina (L.) Th. Fr. | BP | 8374.2 | 1998 |
| Xanthoria parietina (L.) Th. Fr. | BP | 8374.2 | 1998 |
| Xanthoria parietina (L.) Th. Fr. | BP | 9293.1 | 1998 |
| Xanthoria parietina (L.) Th. Fr. | BP | 9394.3 | 1998 |
| Xanthoria parietina (L.) Th. Fr. | BP | 9394.3 | 1998 |
| Xanthoria parietina (L.) Th. Fr. | BP | 9294.3 | 1998 |
| Xanthoria parietina (L.) Th. Fr. | BP | 9294.3 | 1998 |
| Xanthoria parietina (L.) Th. Fr. | BP | 9294.3 | 1998 |
| Xanthoria parietina (L.) Th. Fr. | BP | 9294.3 | 1998 |
| Xanthoria parietina (L.) Th. Fr. | BP | 9394.2 | 1998 |
| Xanthoria parietina (L.) Th. Fr. | BP | 9394.2 | 1998 |
| Xanthoria parietina (L.) Th. Fr. | BP | 9394.2 | 1998 |
| Xanthoria parietina (L.) Th. Fr. | BP | 9394.1 | 1998 |
| Xanthoria parietina (L.) Th. Fr. | BP | 9394.1 | 1998 |
| Xanthoria parietina (L.) Th. Fr. | BP | 9394.1 | 1998 |
| Xanthoria parietina (L.) Th. Fr. | BP | 9394.1 | 1998 |
| Xanthoria parietina (L.) Th. Fr. | BP | 9294.3 | 1998 |
| Xanthoria parietina (L.) Th. Fr. | BP | 9293.4 | 1998 |
| Xanthoria parietina (L.) Th. Fr. | BP | 9293.4 | 1998 |
| Xanthoria parietina (L.) Th. Fr. | BP | 0175.2 | 1999 |
| Xanthoria parietina (L.) Th. Fr. | BP | 0176.1 | 1999 |
| Xanthoria parietina (L.) Th. Fr. | BP | 0175.2 | 1999 |
| Xanthoria parietina (L.) Th. Fr. | BP | 0176.1 | 1999 |
| Xanthoria parietina (L.) Th. Fr. | BP | 0175.2 | 1999 |
| Xanthoria parietina (L.) Th. Fr. | BP | 9293.4 | 1999 |
| Xanthoria parietina (L.) Th. Fr. | BP | 7588.2 | 1999 |
| Xanthoria parietina (L.) Th. Fr. | BP | 0176.1 | 1999 |
| Xanthoria parietina (L.) Th. Fr. | BP | 0175.2 | 1999 |

|                                  |         |        |      |
|----------------------------------|---------|--------|------|
| Xanthoria parietina (L.) Th. Fr. | BP      | 0175.2 | 1999 |
| Xanthoria parietina (L.) Th. Fr. | BP      | 8675.1 | 2000 |
| Xanthoria parietina (L.) Th. Fr. | BP      | 9767.1 | 2000 |
| Xanthoria parietina (L.) Th. Fr. | BP      | 0175.2 | 2000 |
| Xanthoria parietina (L.) Th. Fr. | BP      | 0176.1 | 2000 |
| Xanthoria parietina (L.) Th. Fr. | BP      | 0176.1 | 2000 |
| Xanthoria parietina (L.) Th. Fr. | BP      | 0176.1 | 2000 |
| Xanthoria parietina (L.) Th. Fr. | BP      | 0176.2 | 2000 |
| Xanthoria parietina (L.) Th. Fr. | BP      | 0175.2 | 2000 |
| Xanthoria parietina (L.) Th. Fr. | BP      | 0175.2 | 2000 |
| Xanthoria parietina (L.) Th. Fr. | BP      | 0175.2 | 2000 |
| Xanthoria parietina (L.) Th. Fr. | BP      | 7788.4 | 2005 |
| Xanthoria parietina (L.) Th. Fr. | BP      | 8180.4 | 2007 |
| Xanthoria parietina (L.) Th. Fr. | BP      | 9873.4 | 2008 |
| Xanthoria parietina (L.) Th. Fr. | BP      | 9873.4 | 2008 |
| Xanthoria parietina (L.) Th. Fr. | BP      | 9873.4 | 2008 |
| Xanthoria parietina (L.) Th. Fr. | BP      | 9873.4 | 2008 |
| Xanthoria parietina (L.) Th. Fr. | BP      | 9071.4 | 2009 |
| Xanthoria parietina (L.) Th. Fr. | BP      | 9171.1 | 2009 |
| Xanthoria parietina (L.) Th. Fr. | BP      | 8096.1 | 2010 |
| Xanthoria parietina (L.) Th. Fr. | BP      | 7996.3 | 2010 |
| Xanthoria parietina (L.) Th. Fr. | BP      | 7996.3 | 2010 |
| Xanthoria parietina (L.) Th. Fr. | BP      | 8966.3 | 2010 |
| Xanthoria parietina (L.) Th. Fr. | BP      | 9182.2 | 2011 |
| Xanthoria parietina (L.) Th. Fr. | BP      | 8299.2 | 2011 |
| Xanthoria parietina (L.) Th. Fr. | BP      | 8299.2 | 2011 |
| Xanthoria parietina (L.) Th. Fr. | BP      | 8299.2 | 2011 |
| Xanthoria parietina (L.) Th. Fr. | BP      | 8278.4 | 2011 |
| Xanthoria parietina (L.) Th. Fr. | BP      | 8278.4 | 2011 |
| Xanthoria parietina (L.) Th. Fr. | BP      | 8278.4 | 2011 |
| Xanthoria parietina (L.) Th. Fr. | BP      | 8278.4 | 2011 |
| Xanthoria parietina (L.) Th. Fr. | BP      | 9185.2 | 2012 |
| Xanthoria parietina (L.) Th. Fr. | BP, VBI | 9073.2 | 2012 |
| Xanthoria parietina (L.) Th. Fr. | VBI     | 8368.1 | 2012 |
| Xanthoria parietina (L.) Th. Fr. | BMCRY   | 9073.1 | 2012 |
| Xanthoria parietina (L.) Th. Fr. | BMCRY   | 8974.1 | 2012 |
| Xanthoria parietina (L.) Th. Fr. | BMCRY   | 8873.2 | 2012 |
| Xanthoria parietina (L.) Th. Fr. | BP      | 8496.2 | 2012 |
| Xanthoria parietina (L.) Th. Fr. | BP      | 9582.2 | 2012 |
| Xanthoria parietina (L.) Th. Fr. | BP      | 9582.2 | 2012 |
| Xanthoria parietina (L.) Th. Fr. | BP      | 9270.1 | 2013 |
| Xanthoria parietina (L.) Th. Fr. | BP      | 8597.2 | 2013 |
| Xanthoria parietina (L.) Th. Fr. | BP      | 8497.3 | 2013 |
| Xanthoria parietina (L.) Th. Fr. | BP      | 8498.1 | 2013 |
| Xanthoria parietina (L.) Th. Fr. | BP      | 8497.2 | 2013 |
| Xanthoria parietina (L.) Th. Fr. | BP, DE  | 8496.2 | 2013 |

|                                  |         |        |      |
|----------------------------------|---------|--------|------|
| Xanthoria parietina (L.) Th. Fr. | BP, DE  | 8497.4 | 2013 |
| Xanthoria parietina (L.) Th. Fr. | BP, VBI | 8873.3 | 2013 |
| Xanthoria parietina (L.) Th. Fr. | BP, VBI | 8873.3 | 2013 |
| Xanthoria parietina (L.) Th. Fr. | VBI     | 8368.4 | 2013 |
| Xanthoria parietina (L.) Th. Fr. | VBI     | 8368.4 | 2013 |
| Xanthoria parietina (L.) Th. Fr. | VBI     | 8368.2 | 2013 |
| Xanthoria parietina (L.) Th. Fr. | VBI     | 8368.4 | 2013 |
| Xanthoria parietina (L.) Th. Fr. | VBI     | 9073.3 | 2013 |
| Xanthoria parietina (L.) Th. Fr. | VBI     | 8467.2 | 2013 |
| Xanthoria parietina (L.) Th. Fr. | BMCRY   | 8574.3 | 2013 |
| Xanthoria parietina (L.) Th. Fr. | BMCRY   | 8974.2 | 2013 |
| Xanthoria parietina (L.) Th. Fr. | BMCRY   | 8974.2 | 2013 |
| Xanthoria parietina (L.) Th. Fr. | BMCRY   | 8974.2 | 2013 |
| Xanthoria parietina (L.) Th. Fr. | BMCRY   | 8672.2 | 2013 |
| Xanthoria parietina (L.) Th. Fr. | BMCRY   | 8781.1 | 2013 |
| Xanthoria parietina (L.) Th. Fr. | BMCRY   | 8773.3 | 2013 |
| Xanthoria parietina (L.) Th. Fr. | BMCRY   | 8974.2 | 2013 |
| Xanthoria parietina (L.) Th. Fr. | BMCRY   | 8874.3 | 2013 |
| Xanthoria parietina (L.) Th. Fr. | BMCRY   | 8874.3 | 2013 |
| Xanthoria parietina (L.) Th. Fr. | BMCRY   | 9274.2 | 2013 |
| Xanthoria parietina (L.) Th. Fr. | BMCRY   | 8971.3 | 2013 |
| Xanthoria parietina (L.) Th. Fr. | BMCRY   | 8873.4 | 2013 |
| Xanthoria parietina (L.) Th. Fr. | BMCRY   | 9468.2 | 2013 |
| Xanthoria parietina (L.) Th. Fr. | BMCRY   | 9468.2 | 2013 |
| Xanthoria parietina (L.) Th. Fr. | BMCRY   | 9469.1 | 2013 |
| Xanthoria parietina (L.) Th. Fr. | BMCRY   | 9171.2 | 2013 |
| Xanthoria parietina (L.) Th. Fr. | BP      | 8597.2 | 2013 |
| Xanthoria parietina (L.) Th. Fr. | BP      | 8597.2 | 2013 |
| Xanthoria parietina (L.) Th. Fr. | BP      | 8498.1 | 2013 |
| Xanthoria parietina (L.) Th. Fr. | BP      | 8498.1 | 2013 |
| Xanthoria parietina (L.) Th. Fr. | BP      | 8497.2 | 2013 |
| Xanthoria parietina (L.) Th. Fr. | BP      | 8496.2 | 2013 |
| Xanthoria parietina (L.) Th. Fr. | BP      | 8496.2 | 2013 |
| Xanthoria parietina (L.) Th. Fr. | BP      | 8496.2 | 2013 |
| Xanthoria parietina (L.) Th. Fr. | BP      | 8496.4 | 2013 |
| Xanthoria parietina (L.) Th. Fr. | BP      | 8496.4 | 2013 |
| Xanthoria parietina (L.) Th. Fr. | BP      | 8498.2 | 2013 |
| Xanthoria parietina (L.) Th. Fr. | BP      | 8498.2 | 2013 |
| Xanthoria parietina (L.) Th. Fr. | BP      | 8498.1 | 2013 |
| Xanthoria parietina (L.) Th. Fr. | BP      | 8498.1 | 2013 |
| Xanthoria parietina (L.) Th. Fr. | BP      | 8497.4 | 2013 |
| Xanthoria parietina (L.) Th. Fr. | BP      | 8396.1 | 2013 |
| Xanthoria parietina (L.) Th. Fr. | BP      | 8396.2 | 2013 |
| Xanthoria parietina (L.) Th. Fr. | BMCRY   | 9171.2 | 2013 |
| Xanthoria parietina (L.) Th. Fr. | BMCRY   | 9171.2 | 2013 |
| Xanthoria parietina (L.) Th. Fr. | BMCRY   | 9171.2 | 2013 |

|                                  |       |        |      |
|----------------------------------|-------|--------|------|
| Xanthoria parietina (L.) Th. Fr. | BMCRY | 9171.2 | 2013 |
| Xanthoria parietina (L.) Th. Fr. | BMCRY | 9171.2 | 2013 |
| Xanthoria parietina (L.) Th. Fr. | BP    | 8680.2 | 2013 |
| Xanthoria parietina (L.) Th. Fr. | BP    | 8680.2 | 2013 |
| Xanthoria parietina (L.) Th. Fr. | BP    | 8680.2 | 2013 |
| Xanthoria parietina (L.) Th. Fr. | BP    | 8580.4 | 2013 |
| Xanthoria parietina (L.) Th. Fr. | BP    | 8680.2 | 2013 |
| Xanthoria parietina (L.) Th. Fr. | BP    | 8580.4 | 2013 |
| Xanthoria parietina (L.) Th. Fr. | BP    | 8874.3 | 2014 |
| Xanthoria parietina (L.) Th. Fr. | BP    | 9170.4 | 2014 |
| Xanthoria parietina (L.) Th. Fr. | BP    | 9170.4 | 2014 |
| Xanthoria parietina (L.) Th. Fr. | BP    | 9170.4 | 2014 |
| Xanthoria parietina (L.) Th. Fr. | BP    | 9170.3 | 2014 |
| Xanthoria parietina (L.) Th. Fr. | BMCRY | 8974.1 | 2015 |
| Xanthoria parietina (L.) Th. Fr. | BMCRY | 8973.4 | 2015 |
| Xanthoria parietina (L.) Th. Fr. | BMCRY | 8973.1 | 2015 |
| Xanthoria parietina (L.) Th. Fr. | BP    | 9478.4 | 2016 |
| Xanthoria parietina (L.) Th. Fr. | BP    | 8495.2 | 2016 |
| Xanthoria parietina (L.) Th. Fr. | BMCRY | 9680.2 | 2016 |
| Xanthoria parietina (L.) Th. Fr. | BP    | 9680.2 | 2016 |
| Xanthoria parietina (L.) Th. Fr. | BP    | 9680.2 | 2016 |
| Xanthoria parietina (L.) Th. Fr. | BP    | 9680.2 | 2016 |
| Xanthoria parietina (L.) Th. Fr. | BP    | 9680.2 | 2016 |
| Xanthoria parietina (L.) Th. Fr. | BP    | 9680.2 | 2016 |
| Xanthoria parietina (L.) Th. Fr. | BP    | 9680.2 | 2016 |
| Xanthoria parietina (L.) Th. Fr. | BP    | 9680.2 | 2016 |
| Xanthoria parietina (L.) Th. Fr. | BP    | 9680.2 | 2016 |
| Xanthoria parietina (L.) Th. Fr. | BP    | 9680.2 | 2016 |
| Xanthoria parietina (L.) Th. Fr. | BP    | 9580.4 | 2016 |
| Xanthoria parietina (L.) Th. Fr. | BP    | 9580.4 | 2016 |
| Xanthoria parietina (L.) Th. Fr. | BP    | 9580.4 | 2016 |
| Xanthoria parietina (L.) Th. Fr. | BMCRY | 8476.4 | 2017 |
| Xanthoria parietina (L.) Th. Fr. | BP    | 8773.3 | 2017 |
| Xanthoria parietina (L.) Th. Fr. | BP    | 9367.3 | 2017 |
| Xanthoria parietina (L.) Th. Fr. | BP    | 9367.3 | 2017 |
| Xanthoria parietina (L.) Th. Fr. | BP    | 9467.3 | 2017 |
| Xanthoria parietina (L.) Th. Fr. | BP    | 9465.2 | 2017 |
| Xanthoria parietina (L.) Th. Fr. | BP    | 8579.2 | 2017 |
| Xanthoria parietina (L.) Th. Fr. | BMCRY | 8476.4 | 2017 |
| Xanthoria parietina (L.) Th. Fr. | BP    | 8476.4 | 2017 |
| Xanthoria parietina (L.) Th. Fr. | BP    | 8476.4 | 2017 |
| Xanthoria parietina (L.) Th. Fr. | BP    | 8476.4 | 2017 |
| Xanthoria parietina (L.) Th. Fr. | BP    | 8476.4 | 2017 |
| Xanthoria parietina (L.) Th. Fr. | BP    | 9383.2 | 2018 |
| Xanthoria parietina (L.) Th. Fr. | BP    | 8294.4 | 2018 |
| Xanthoria parietina (L.) Th. Fr. | BP    | 8380.2 | 2018 |
| Xanthoria parietina (L.) Th. Fr. | BP    | 8380.2 | 2018 |
| Xanthoria parietina (L.) Th. Fr. | BP    | 8380.4 | 2018 |

|                                  |    |        |      |
|----------------------------------|----|--------|------|
| Xanthoria parietina (L.) Th. Fr. | BP | 8380.4 | 2018 |
| Xanthoria parietina (L.) Th. Fr. | BP | 8380.4 | 2018 |
| Xanthoria parietina (L.) Th. Fr. | BP | 8380.4 | 2018 |
| Xanthoria parietina (L.) Th. Fr. | BP | 8187.1 | 2018 |
| Xanthoria parietina (L.) Th. Fr. | BP | 8880.3 | 2019 |
| Xanthoria parietina (L.) Th. Fr. | BP | 8880.3 | 2019 |
| Xanthoria parietina (L.) Th. Fr. | BP | 8980.1 | 2019 |
| Xanthoria parietina (L.) Th. Fr. | BP | 8980.1 | 2019 |
| Xanthoria parietina (L.) Th. Fr. | BP | 8980.1 | 2019 |
| Xanthoria parietina (L.) Th. Fr. | BP | 8980.1 | 2019 |
| Xanthoria parietina (L.) Th. Fr. | BP | 8979.2 | 2019 |
| Xanthoria parietina (L.) Th. Fr. | BP | 8079.4 | 2020 |
| Xanthoria parietina (L.) Th. Fr. | BP | 8079.3 | 2020 |
| Xanthoria parietina (L.) Th. Fr. | BP | 8479.3 | 2020 |
| Xanthoria parietina (L.) Th. Fr. | BP | 8479.4 | 2020 |
| Xanthoria parietina (L.) Th. Fr. | BP | 9384.3 | 2020 |
| Xanthoria parietina (L.) Th. Fr. | BP | 9384.3 | 2020 |
| Xanthoria parietina (L.) Th. Fr. | BP | 8676.1 | 2021 |
| Xanthoria parietina (L.) Th. Fr. | BP | 8773.4 | 2021 |
| Xanthoria parietina (L.) Th. Fr. | BP | 8479.2 | 2021 |
| Xanthoria parietina (L.) Th. Fr. | BP | 8782.1 | 2021 |
| Xanthoria parietina (L.) Th. Fr. | BP | 8782.1 | 2021 |
| Xanthoria parietina (L.) Th. Fr. | BP | 8782.1 | 2021 |
| Xanthoria parietina (L.) Th. Fr. | BP | 8782.1 | 2021 |
| Xanthoria parietina (L.) Th. Fr. | BP | 9383.2 | 2021 |
| Xanthoria parietina (L.) Th. Fr. | BP | 8479.2 | 2021 |
| Xanthoria parietina (L.) Th. Fr. | BP | 0176.2 | 2021 |
| Xanthoria parietina (L.) Th. Fr. | BP | 8087.2 | 2021 |
| Xanthoria parietina (L.) Th. Fr. | BP | 8286.3 | 2021 |
| Xanthoria parietina (L.) Th. Fr. | BP | 9769.1 | 2021 |
| Xanthoria parietina (L.) Th. Fr. | BP | 8782.1 | 2021 |
| Xanthoria parietina (L.) Th. Fr. | BP | 8782.1 | 2021 |
| Xanthoria parietina (L.) Th. Fr. | BP | 8782.1 | 2021 |
| Xanthoria parietina (L.) Th. Fr. | BP | 9265.3 | 2021 |
| Xanthoria parietina (L.) Th. Fr. | BP | 9365.1 | 2021 |
| Xanthoria parietina (L.) Th. Fr. | BP | 9365.1 | 2021 |
| Xanthoria parietina (L.) Th. Fr. | BP | 9170.4 | 2022 |
| Xanthoria parietina (L.) Th. Fr. | BP | 9171.3 | 2022 |
| Xanthoria parietina (L.) Th. Fr. | BP | 8675.2 | 2022 |
| Xanthoria parietina (L.) Th. Fr. | BP | 8675.2 | 2022 |
| Xanthoria parietina (L.) Th. Fr. | DE | 7594.1 | 2022 |
| Xanthoria parietina (L.) Th. Fr. | DE | 7595.3 | 2022 |
| Xanthoria parietina (L.) Th. Fr. | DE | 8097.4 | 2022 |
| Xanthoria parietina (L.) Th. Fr. | DE | 8200.3 | 2022 |
| Xanthoria parietina (L.) Th. Fr. | DE | 8275.4 | 2022 |
| Xanthoria parietina (L.) Th. Fr. | DE | 8296.3 | 2022 |

|                                  |    |        |      |
|----------------------------------|----|--------|------|
| Xanthoria parietina (L.) Th. Fr. | DE | 8297.1 | 2022 |
| Xanthoria parietina (L.) Th. Fr. | DE | 8299.3 | 2022 |
| Xanthoria parietina (L.) Th. Fr. | DE | 8395.4 | 2022 |
| Xanthoria parietina (L.) Th. Fr. | DE | 8398.1 | 2022 |
| Xanthoria parietina (L.) Th. Fr. | DE | 8398.3 | 2022 |
| Xanthoria parietina (L.) Th. Fr. | DE | 8398.4 | 2022 |
| Xanthoria parietina (L.) Th. Fr. | DE | 8495.2 | 2022 |
| Xanthoria parietina (L.) Th. Fr. | DE | 8496.1 | 2022 |
| Xanthoria parietina (L.) Th. Fr. | DE | 8496.2 | 2022 |
| Xanthoria parietina (L.) Th. Fr. | DE | 8496.3 | 2022 |
| Xanthoria parietina (L.) Th. Fr. | DE | 8496.4 | 2022 |
| Xanthoria parietina (L.) Th. Fr. | DE | 8497.1 | 2022 |
| Xanthoria parietina (L.) Th. Fr. | DE | 8497.2 | 2022 |
| Xanthoria parietina (L.) Th. Fr. | DE | 8497.3 | 2022 |
| Xanthoria parietina (L.) Th. Fr. | DE | 8497.4 | 2022 |
| Xanthoria parietina (L.) Th. Fr. | DE | 8498.1 | 2022 |
| Xanthoria parietina (L.) Th. Fr. | DE | 8498.2 | 2022 |
| Xanthoria parietina (L.) Th. Fr. | DE | 8595.4 | 2022 |
| Xanthoria parietina (L.) Th. Fr. | DE | 8596.1 | 2022 |
| Xanthoria parietina (L.) Th. Fr. | DE | 8596.2 | 2022 |
| Xanthoria parietina (L.) Th. Fr. | DE | 8596.3 | 2022 |
| Xanthoria parietina (L.) Th. Fr. | DE | 8596.4 | 2022 |
| Xanthoria parietina (L.) Th. Fr. | DE | 8597.1 | 2022 |
| Xanthoria parietina (L.) Th. Fr. | DE | 8597.2 | 2022 |
| Xanthoria parietina (L.) Th. Fr. | DE | 8597.3 | 2022 |
| Xanthoria parietina (L.) Th. Fr. | DE | 8695.4 | 2022 |
| Xanthoria parietina (L.) Th. Fr. | DE | 8697.1 | 2022 |
| Xanthoria parietina (L.) Th. Fr. | DE | 8795.2 | 2022 |
| Xanthoria parietina (L.) Th. Fr. | BP | 9369.4 | 2022 |
| Xanthoria parietina (L.) Th. Fr. | BP | 9569.2 | 2022 |
| Xanthoria parietina (L.) Th. Fr. | BP | 8482.1 | 2022 |

[57] Niklfeld, H. Bericht über die Kartierung der Flora Mitteleuropa. *Taxon* **1971**, 20(4), 545–571.

<https://doi.org/10.2307/1218258>

[58] Borhidi, A. Role of mapping the flora of Europe in nature conservation. *Norrlinia* **1984**, 2, 87–98.
